# Supplementary material for: Characterization of a Decapentapletic Gene (AccDpp) from Apis cerana cerana and Its Possible Involvement in Development and Response to Oxidative Stress
Source: PLoS One. 2016 Feb 16;11(2):e0149117. doi: 10.1371/journal.pone.0149117 (PMC4755538; doi:10.1371/journal.pone.0149117)
Supplement: S5 Table — (DOC) [file pone.0149117.s006.doc]

**S5 Table.** The basic subunit of AccDpp secondary structure.

| Amino acid | Subunit | Amino acid | Subunit |
| --- | --- | --- | --- |
| 17-34 | α1 | 226-231 | β9 |
| 50-59 | α2 | 240-247 | α4 |
| 79-83 | β1 | 255-259 | α5 |
| 100-104 | β2 | 267-273 | β10 |
| 117-122 | β3 | 290-296 | β11 |
| 138-146 | β4 | 313-317 | α6 |
| 148-151 | β5 | 333-338 | β12 |
| 154-166 | β6 | 340-344 | β13 |
| 174-178 | β7 | 352-356 | β14 |
| 179-186 | α3 | 360-365 | β15 |
| 193-200 | β8 |  |  |
